# Supplementary material for: Gold Nanorod-Incorporated Halloysite Nanotubes Functionalized with Antibody for Superior Antibacterial Photothermal Treatment
Source: MDPI journal article supplement (doi:10.3390/pharmaceutics14102094), 2022-09-30
Supplement: s1 [file s1]

## **Supporting Information**

### **Gold Nanorod-Incorporated Halloysite Nanotubes Functionalized with Antibody for Superior Antibacterial Photothermal Treatment**

**Ofer Prinz Setter<sup>1</sup>, Iser Snoyman<sup>1</sup>, Ghazal Shalash<sup>1</sup> and Ester Segal<sup>1,2,\*</sup>**

<sup>1</sup> Department of Biotechnology and Food Engineering, Technion—Israel Institute of Technology, Technion City, Haifa 3200003, Israel

<sup>2</sup> The Russel Berrie Nanotechnology Institute, Technion—Israel Institute of Technology, Technion City, Haifa 3200003, Israel

\* Correspondence: [esegal@technion.ac.il](mailto:esegal@technion.ac.il); Tel: +972-4-829-5071

## Table of Contents

|                                                                                                                                                  |          |
|--------------------------------------------------------------------------------------------------------------------------------------------------|----------|
| Figure S1: Antibacterial photothermal treatment (APTT) of free AuNR                                                                              | Page S3  |
| Figure S2: STEM-EDX analysis for AuNR-Ab-HNTs hybrid, Ab-HNTs and pristine HNTs                                                                  | Page S4  |
| Figure S3: Stability monitoring of the AuNR-Ab-HNTs hybrid                                                                                       | Page S5  |
| Calculation of the photothermal conversion efficiency of AuNR ( $20 \mu\text{g mL}^{-1}$ ) and AuNR-Ab-HNTs hybrid                               | Page S6  |
| Table S1: Summary of previous reports for HNTs incorporated with gold nanoparticles for photothermal applications                                | Page S8  |
| Table S2: Summary of previous reports for gold nanorods utilized for antibacterial applications                                                  | Page S9  |
| Figure S4: Antibacterial photothermal treatment (APTT) of AuNR-Ab-HNTs hybrids compared with free AuNR at power density of $3 \text{ W cm}^{-2}$ | Page S10 |

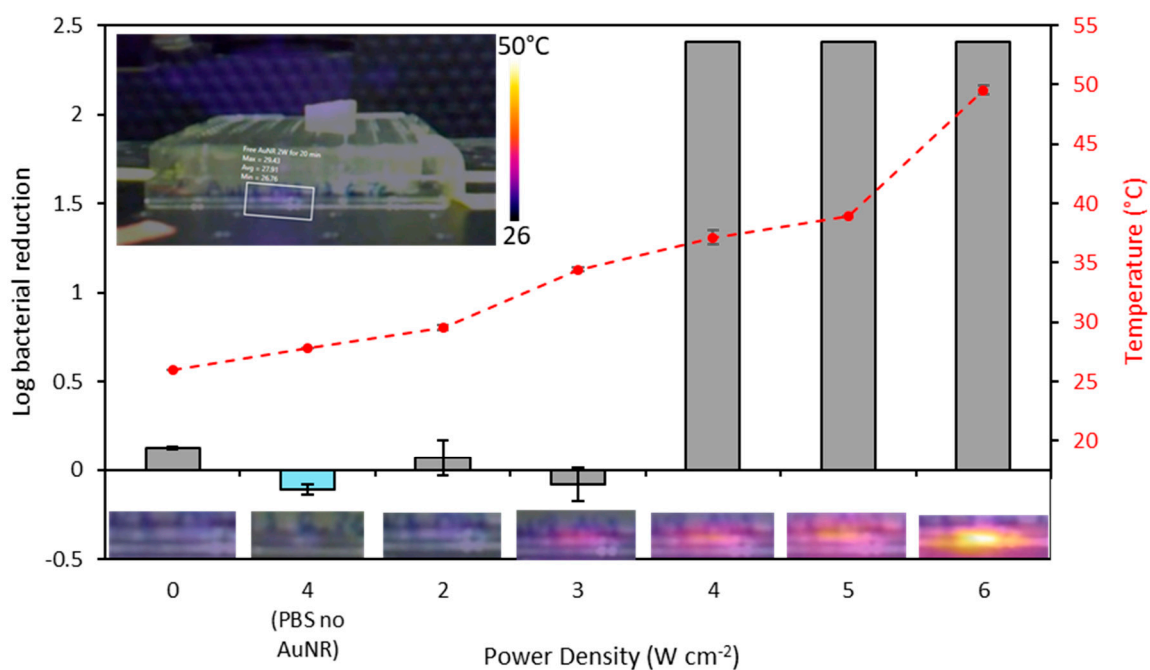

**Figure S1.** Antibacterial photothermal treatment (APTT) of free AuNR against *E. coli* after 20 min of irradiation (808 nm) at different power density: bulk temperature as measured by a thermal camera (red plot, right axis) and log of bacterial reduction (columns, left axis). Inset depicts the full thermal image of the irradiated well in the 96-well plate.

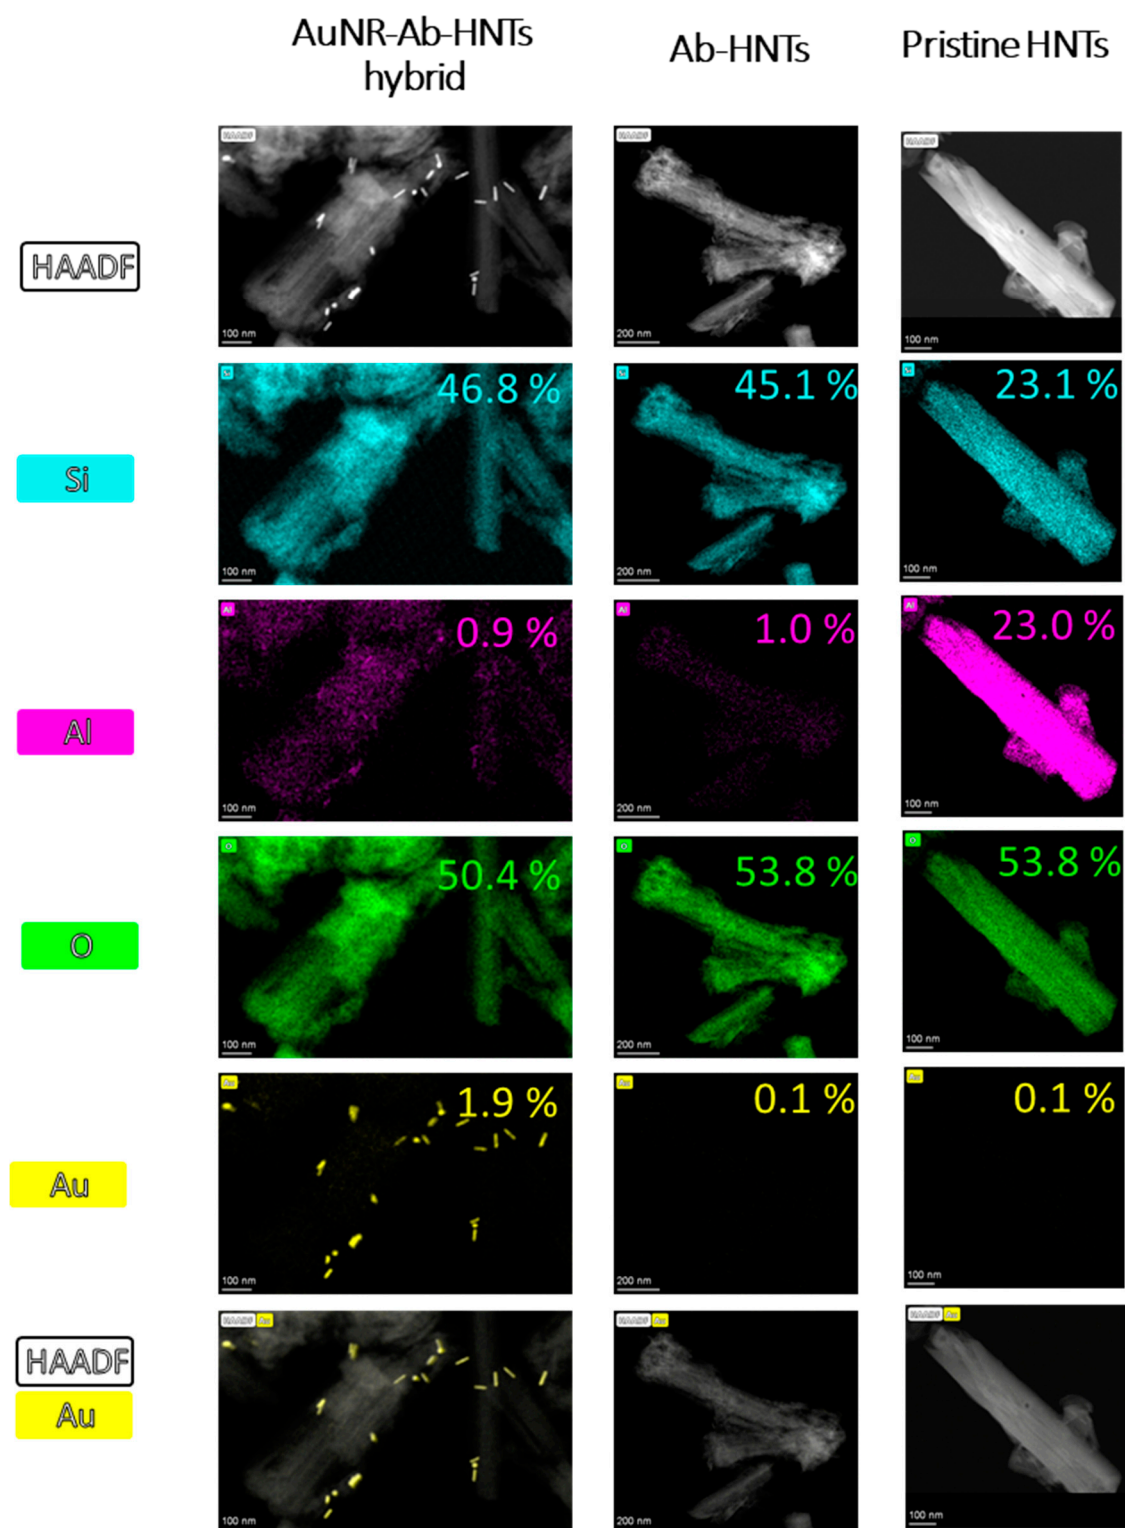

**Figure S2.** STEM-EDX analysis for AuNR-Ab-HNTs hybrid (left panel), Ab-HNTs (middle panel) and pristine HNTs (right panel) including high-angle annular dark-field (HAADF) image with the corresponding elemental mapping (Si, Al, O, and Au). The measured wt. % of each element is indicated at the right corner of each micrograph.

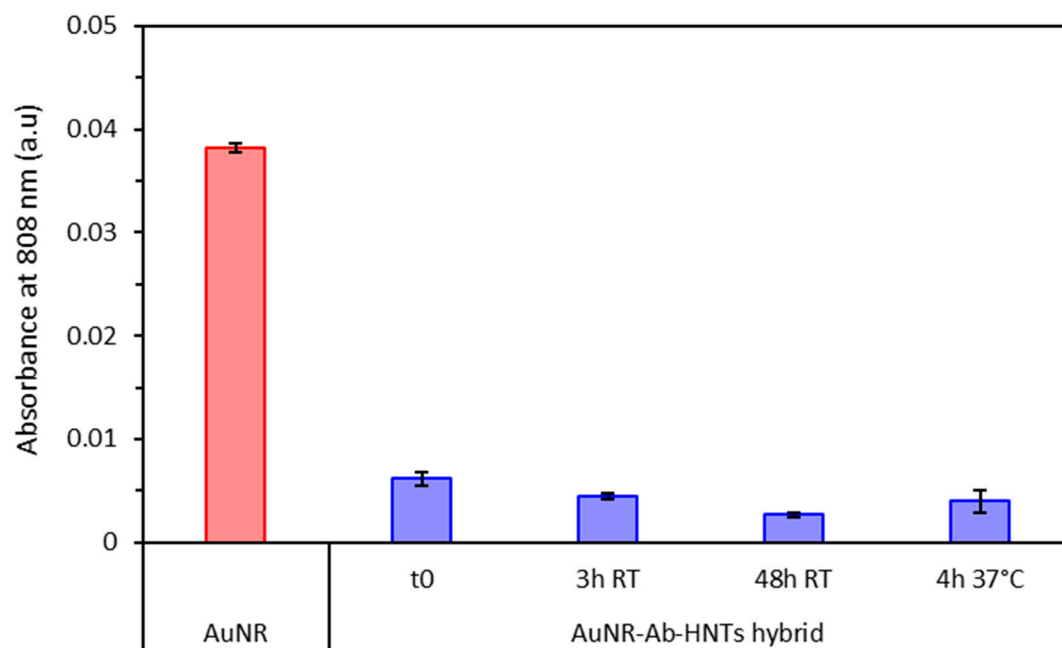

**Figure S3.** Stability monitoring of the AuNR-Ab-HNTs hybrid by absorbance measurement at 808 nm for the suspending medium at various storage conditions in comparison to free AuNR suspension.

**Calculation of the photothermal conversion efficiency of AuNR (20  $\mu\text{g mL}^{-1}$ ) and AuNR-Ab-HNTs hybrid (1.5  $\text{mg mL}^{-1}$ ) under 4  $\text{W cm}^{-2}$  irradiation of 808 nm laser [1,2]**

During irradiation, heat balance is expressed by Eq. S1:

$$\sum_i^n m_i C p_i \frac{dT}{dt} = Q_{NR} + Q_{Dis} - Q_{Surr} \quad (\text{S1})$$

where  $m_i$  and  $C p_i$  are the mass and heat capacity of each component in the system,  $T$  is the temperature of the whole system,  $Q_{NR}$  is the heat generated by the localized surface plasmon resonance (LSPR) effect,  $Q_{Dis}$  is the heat dissipated by all the system components other than the gold nanorods that absorb the laser, and  $Q_{Surr}$  is the heat conducted to the surroundings by air due to the temperature gradient.

Assuming the mass of the suspended particles is small compared to the PBS in the well, Eq. S1 is simplified into Eq. S2:

$$m_w C p_w \frac{dT}{dt} = Q_{NR} + Q_{Dis} - Q_{Surr} \quad (\text{S2})$$

where  $m_w$  and  $C p_w$  are the mass and heat capacity of water in the irradiated well, given the the values 0.2 g and 4.2  $\text{J g}^{-1} \text{ } ^\circ\text{C}^{-1}$ , respectively.

When the system reaches maximum temperature, it is at a heat transfer steady state, therefore  $\frac{dT}{dt} = 0$  and input energy equals to the heat conducted away by air, described in Eq. S3:

$$Q_{NR} + Q_{Dis} = Q_{Surr} \quad (\text{S3})$$

The laser induced heat input by LSPR,  $Q_{NR}$  is given by:

$$Q_{NR} = I(1 - 10^{-A^{808 \text{ nm}}})\eta \quad (\text{S4})$$

where  $I$  is the laser intensity,  $A^{808 \text{ nm}}$  is the absorbance of the nanorods at 808 nm, and  $\eta$

is the photothermal conversion efficiency of the investigated compound.

The heat conduction to the surroundings by air during steady state,  $Q_{Surr}$  is expressed by the heat transfer equation:

$$Q_{Surr} = hS(T_{max} - T_{surr}) \quad (\text{S5})$$

where  $h$  is the heat transfer coefficient,  $S$  is the effective area for heat transfer,  $T_{max}$  is the maximum temperature of the system during steady state and  $T_{surr}$  is the surrounding temperature.

Combining Eq. S3, S4 and S5 gives:

$$\eta = \frac{hS(T_{max} - T_{surr}) - Q_{Dis}}{I(1 - 10^{-A^{808 \text{ nm}}})} \quad (\text{S6})$$

Assuming  $hS$  is not temperature dependent, it is possible to derive it from the cooling stage when the laser is turned off ( $Q_{NR} = 0$  and  $Q_{Dis} = 0$ ), and Eq. S2 and S5 becomes:

$$\begin{aligned}
m_w C p_w \frac{dT}{dt} &= 0 + 0 - hS(T - T_{surr}) \\
\frac{dT}{T - T_{surr}} &= - \frac{hS dt}{m_w C p_w} \\
\ln \left( \frac{T - T_{surr}}{T_{max} - T_{surr}} \right) &= - \frac{hS t}{m_w C p_w}
\end{aligned} \tag{S7}$$

When plotting  $-\ln \left( \frac{T - T_{surr}}{T_{max} - T_{surr}} \right)$  against  $t$  during the cooling stage we obtain the slope

$$\begin{aligned}
\frac{hS}{m_w C p_w} &= 0.0038 \text{ s}^{-1} \\
hS &= 0.0038 \text{ s}^{-1} \cdot 0.2 \text{ g} \cdot 4.2 \text{ J g}^{-1} \text{ }^\circ\text{C}^{-1} = 0.0032 \text{ W }^\circ\text{C}^{-1}
\end{aligned}$$

$Q_{Dis}$  is calculated according to the irradiation of only PBS at steady state where  $Q_{NR} = 0$ , according to Eq. S3 and S5:

$$0 + Q_{Dis} = hS(T_{max} - T_{surr}) \tag{S8}$$

In that case  $T_{max}$  was 28°C (see Figure 4b in the manuscript) and  $T_{surr}$  was 26 °C, and  $Q_{Dis}$  thus calculated to be 0.0063 W.

Combining the calculated  $hS$  and  $Q_{Dis}$ , it is possible to calculate  $\eta$  according to Eq. 6 given that under 4 W cm<sup>-2</sup>,  $T_{max}$  was measured to be 36 and 30 °C for AuNR and Ab-AuNR-HNTs hybrid, respectively (see Figure 4b in the manuscript) and the surrounding temperature was 26 °C.  $I$  is 4 W cm<sup>-2</sup> x 0.32 cm<sup>2</sup> (well area) = 1.28 W, and  $A^{808 \text{ nm}}$  is 0.13 (see Figure 2b in the manuscript).

Thus,

$$\begin{aligned}
\eta_{AuNR} &= \frac{hS(T_{max} - T_{surr}) - Q_{Dis}}{I(1 - 10^{-A^{808 \text{ nm}}})} = \frac{0.0032 \text{ W }^\circ\text{C}^{-1}(36 - 26^\circ\text{C}) - 0.0063 \text{ W}}{1.28 \text{ W}(1 - 10^{-0.13})} * 100 = \mathbf{7.8\%} \\
\eta_{AuNR-Ab-HNTs} &= \frac{hS(T_{max} - T_{surr}) - Q_{Dis}}{I(1 - 10^{-A^{808 \text{ nm}}})} = \frac{0.0032 \text{ W }^\circ\text{C}^{-1}(30 - 26^\circ\text{C}) - 0.0063 \text{ W}}{1.28 \text{ W}(1 - 10^{-0.13})} * 100 = \mathbf{2.0\%}
\end{aligned}$$

**Table S1.** Summary of previous reports for HNTs incorporated with gold nanoparticles for photothermal applicaitons

| Sample                                        | Gold particles                                                       | Application   | Concentration                                               | Irradiation                                                                                     | Maximum Temperature (°C) | Antibacterial                                                                              | Ref |
|-----------------------------------------------|----------------------------------------------------------------------|---------------|-------------------------------------------------------------|-------------------------------------------------------------------------------------------------|--------------------------|--------------------------------------------------------------------------------------------|-----|
| Gold nanoparticles in HNTs-chitin hydrogel    | Round 5-10 nm synthesized inside HNTs lumen                          | Wound healing | Au: unknown<br>HNTs: 12 mg mL <sup>-1</sup>                 | 808 nm, 0.8-2.2 W cm <sup>-2</sup> 5-8 min                                                      | 40                       | <i>E. coli</i> , <i>S. aureus</i><br>10 <sup>6</sup> cell mL <sup>-1</sup> 2 log reduction | [3] |
| Gold nanoparticles on HNTs                    | Round 10 nm synthesized onto HNTs                                    | Antimicrobial | Au: 50 µg mL <sup>-1</sup><br>HNTs: 1 mg mL <sup>-1</sup>   | Continuous: 515 nm, 1 W cm <sup>-2</sup> , 180 min<br>Pulse: 532 nm 20 ns 12 W cm <sup>-2</sup> | 25                       | <i>Paramecium caudatum</i><br>2 log reduction                                              | [4] |
| Gold nanorods in HNTs loaded with doxorubicin | Rods synthesized inside HNTs lumen.<br>HNTs modified with folic acid | Antitumor     | Au: 20 µg mL <sup>-1</sup><br>HNTs: 0.4 mg mL <sup>-1</sup> | 808 nm, 1 W cm <sup>-2</sup> , 8 min                                                            | 58                       | N/A                                                                                        | [5] |
| Gold nanoparticle or continuous shell on HNTs | Round 20-40 nm particles or a continuous shell synthesized onto HNTs | N/A           | Au: 40 µg mL <sup>-1</sup><br>HNTs: 2 mg mL <sup>-1</sup>   | 808 nm, 0.8 W cm <sup>-2</sup> , 12 min                                                         | 32                       | N/A                                                                                        | [6] |



**Table S2.** Summary of previous reports for gold nanorods utilized for antibacterial applications

| Sample                                                           | Concentration ( $\mu\text{g mL}^{-1}$ ) | Irradiation                                  | Maximum Temperature ( $^{\circ}\text{C}$ )   | Bacteria                                                       | Antibacterial Effect                                                | Ref  |
|------------------------------------------------------------------|-----------------------------------------|----------------------------------------------|----------------------------------------------|----------------------------------------------------------------|---------------------------------------------------------------------|------|
| Hydrophilic and hydrophobic AuNR length: 40, diameter: 10 nm     | Hydrophilic: 8<br>Hydrophobic: 170      | 808 nm, 3 W $\text{cm}^{-2}$ 15 min          | Hydrophilic: 60<br>Hydrophobic: 55 (on agar) | <i>Staphylococcus aureus</i><br><i>Propionibacterium acnes</i> | 4 log reduction<br>Initial conc: $10^6$ cell $\text{mL}^{-1}$       | [7]  |
| Silica coated AuNR length: 40, diameter: 15 nm                   | 30                                      | 808 nm, 3 W $\text{cm}^{-2}$ up to 5 min     | 45-61                                        | <i>E. coli</i>                                                 | 50% - 2 log reduction<br>Initial conc: $10^6$ cell $\text{mL}^{-1}$ | [8]  |
| AuNR length: 33, diameter: 7 nm                                  | 6<br>2                                  | 810 nm, $\sim 0.6$ W $\text{cm}^{-2}$ 20 min | 65                                           | <i>Staphylococcus aureus</i><br><i>E. coli</i>                 | 4 log reduction<br>Initial conc: $10^4$ cell $\text{mL}^{-1}$       | [9]  |
| AuNR functionalized with antibodies length: 68, diameter: 18 nm  | Unknown                                 | 785 nm, 0.08 W (unknown area), 5 min         | Unknown                                      | <i>Pseudo aeruginosa</i>                                       | 80 % reduction                                                      | [10] |
| AuNR functionalized with protease length: 32, diameter: 8 nm     | 50<br>40                                | 808 nm, 2 W $\text{cm}^{-2}$ , 20 min        | $\sim 60$                                    | <i>Staphylococcus aureus</i><br><i>E. coli</i>                 | 2 log reduction<br>Initial conc: $10^6$ cell $\text{mL}^{-1}$       | [11] |
| Phospholipid-decorated gold nanorods length: 50, diameter: 12 nm | 7.5                                     | 808 nm , 3 W $\text{cm}^{-2}$ , 15 min       | 62                                           | <i>Pseudomonas aeruginosa</i>                                  | 6 log reduction<br>Initial conc: $10^6$ cell $\text{mL}^{-1}$       | [12] |
| AuNR modified with an Ag and Pt shell Length: 60, diameter: 20   | 20                                      | 808 nm , 22 W $\text{cm}^{-2}$ , 5 min       | 65                                           | <i>E. coli</i>                                                 | 7 log reduction<br>Initial conc: $10^8$ cell $\text{mL}^{-1}$       | [13] |
| AuNR Length: 50, diameter: 13                                    | 10                                      | 785 nm , 0.05 W $\text{cm}^{-2}$ , 10 min    | 44                                           | <i>E. coli</i>                                                 | 50 % reduction<br>Initial conc: $10^3$ cell $\text{mL}^{-1}$        | [14] |
| AuNR modified with an Ag shell Length: 50, diameter: 13          |                                         |                                              |                                              |                                                                | 2 log reduction                                                     |      |

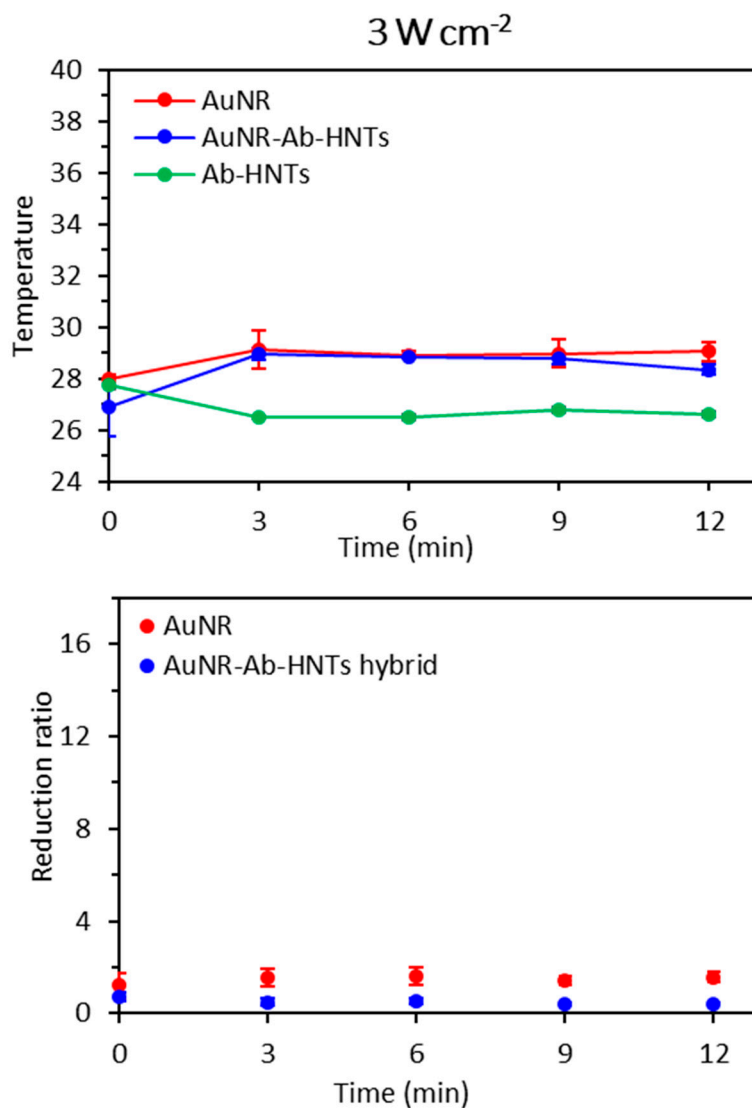

**Figure S4.** Antibacterial photothermal treatment (APTT) of AuNR-Ab-HNTs hybrids compared with free AuNR at power density of  $3 \text{ W cm}^{-2}$ . Upper panel – temperature measurements by a thermal camera as a function of irradiation (808 nm) time for AuNR-Ab-HNTs hybrids (blue), free AuNR (red), and Ab-HNTs without AuNR (green). Lower panel – antibacterial effect measured by plate count as a function of irradiation (808 nm) time (color scheme similar to all other results in this figure). Error bars represent SD ( $n=3$ ).

## References:

1. Tian, Q.; Jiang, F.; Zou, R.; Liu, Q.; Chen, Z.; Zhu, M.; Yang, S.; Wang, J.; Wang, J.; Hu, J. Hydrophilic Cu<sub>9</sub>S<sub>5</sub> Nanocrystals: A Photothermal Agent with a 25.7% Heat Conversion Efficiency for Photothermal Ablation of Cancer Cells in Vivo. *ACS Nano* **2011**, *5*, 9761–9771, doi:10.1021/NN203293T.
2. Liu, X.; Li, B.; Fu, F.; Xu, K.; Zou, R.; Wang, Q.; Zhang, B.; Chen, Z.; Hu, J. Facile Synthesis of Biocompatible Cysteine-Coated CuS Nanoparticles with High Photothermal Conversion Efficiency for Cancer Therapy. *Dalton Transactions* **2014**, *43*, 11709–11715, doi:10.1039/C4DT00424H.
3. Zhao, P.; Feng, Y.; Zhou, Y.; Tan, C.; Liu, M. Gold@Halloysite Nanotubes-Chitin Composite Hydrogel with Antibacterial and Hemostatic Activity for Wound Healing. *Bioact Mater* **2023**, *20*, 355–367, doi:10.1016/J.BIOACTMAT.2022.05.035.
4. Kornilova, A. v.; Kuralbayeva, G.A.; Stavitskaya, A. v.; Gorbachevskii, M. v.; Karpukhina, O. v.; Lysenko, I. v.; Pryadun, V. v.; Novikov, A.A.; Vasiliev, A.N.; Timoshenko, V.Y. Gold Nanoparticles Immobilized on Halloysite Nanotubes for Spatially-Temporally Localized Photohyperthermia. *Appl Surf Sci* **2021**, *566*, doi:10.1016/J.APSUSC.2021.150671.
5. Zhang, J.; Luo, X.; Wu, Y.P.; Wu, F.; Li, Y.F.; He, R.R.; Liu, M. Rod in Tube: A Novel Nanoplatfrom for Highly Effective Chemo-Photothermal Combination Therapy toward Breast Cancer. *ACS Appl Mater Interfaces* **2019**, *11*, 3690–3703, doi:10.1021/ACSAMI.8B17533.
6. Zieba, M.; Hueso, J.L.; Arruebo, M.; Martínez, G.; Santamaría, J. Gold-Coated Halloysite Nanotubes as Tunable Plasmonic Platforms. *New Journal of Chemistry* **2014**, *38*, 2037–2042, doi:10.1039/C3NJ01127E.
7. Mahmoud, N.N.; Alkilany, A.M.; Khalil, E.A.; Al-Bakri, A.G. Nano-Photothermal Ablation Effect of Hydrophilic and Hydrophobic Functionalized Gold Nanorods on Staphylococcus Aureus and Propionibacterium Acnes. *Scientific Reports* **2018**, *8*, 1–10, doi:10.1038/s41598-018-24837-7.
8. Qiang, L.; Jin, H.; Feng, Y.; Wu, R.; Song, Y.; Liu, L. Apoptosis-like Bacterial Death Modulated by Photoactive Hyperthermia Nanomaterials and Enhanced Wound Disinfection Application. *Nanoscale* **2021**, *13*, 14785–14794, doi:10.1039/D1NR02881B.
9. Castillo-Martínez, J.C.; Martínez-Castanon, G.A.; Martínez-Gutierrez, F.; Zavala-Alonso, N.V.; Patiño-Marín, N.; Niño-Martínez, N.; Zaragoza-Magaña, V.; Cabral-Romero, C. Antibacterial and Antibiofilm Activities of the Photothermal Therapy Using Gold Nanorods against Seven Different Bacterial Strains. *J Nanomater* **2015**, *2015*, doi:10.1155/2015/783671.
10. Norman, R.S.; Stone, J.W.; Gole, A.; Murphy, C.J.; Sabo-Attwood, T.L. Targeted Photothermal Lysis of the Pathogenic Bacteria, Pseudomonas Aeruginosa, with Gold Nanorods. *Nano Lett* **2008**, *8*, 302–306, doi:10.1021/nl0727056.
11. Li, W.; Geng, X.; Liu, D.; Li, Z. Near-Infrared Light-Enhanced Protease-Conjugated Gold Nanorods As A Photothermal Antimicrobial Agent For Elimination Of Exotoxin And Biofilms. *Int J Nanomedicine* **2019**, *14*, 8047–8058, doi:10.2147/IJN.S212750.
12. Al-Bakri, A.G.; Mahmoud, N.N.; Estelrich, J.; Busquets, M.A. Photothermal-Induced Antibacterial Activity of Gold Nanorods Loaded into Polymeric Hydrogel against Pseudomonas Aeruginosa Biofilm. **2019**, doi:10.3390/molecules24142661.

13. Hu, X.; Zhao, Y.; Hu, Z.; Saran, A.; Hou, S.; Wen, T.; Liu, W.; Ji, Y.; Jiang, X.; Wu, X. Gold Nanorods Core/AgPt Alloy Nanodots Shell: A Novel Potent Antibacterial Nanostructure. *Nano Research* 2013 6:11 **2013**, 6, 822–835, doi:10.1007/S12274-013-0360-4.
14. Hu, B.; Wang, N.; Han, L.; Chen, M.L.; Wang, J.H. Core–Shell–Shell Nanorods for Controlled Release of Silver That Can Serve as a Nanoheater for Photothermal Treatment on Bacteria. *Acta Biomater* **2015**, 11, 511–519, doi:10.1016/J.ACTBIO.2014.09.005.
